# Supplementary material for: Tailored group exercise (Falls Management Exercise — FaME) reduces falls in community-dwelling older frequent fallers (an RCT)
Source: Oxford University Press journal article supplement (doi:10.1093/ageing/afi174), 2005-11-01
Supplement: afi174_Supplementary_Data.zip [file afi174_Supplementary_Data.zip]

Archive with 1 entries (1 files):
- afi174suppdata.pdf
